# Supplementary material
Source: Springer Nature journal article supplement (https://www.springermedizin.de/resource/supplementary/12875_2011_689_MOESM1_ESM.pdf/9435192)

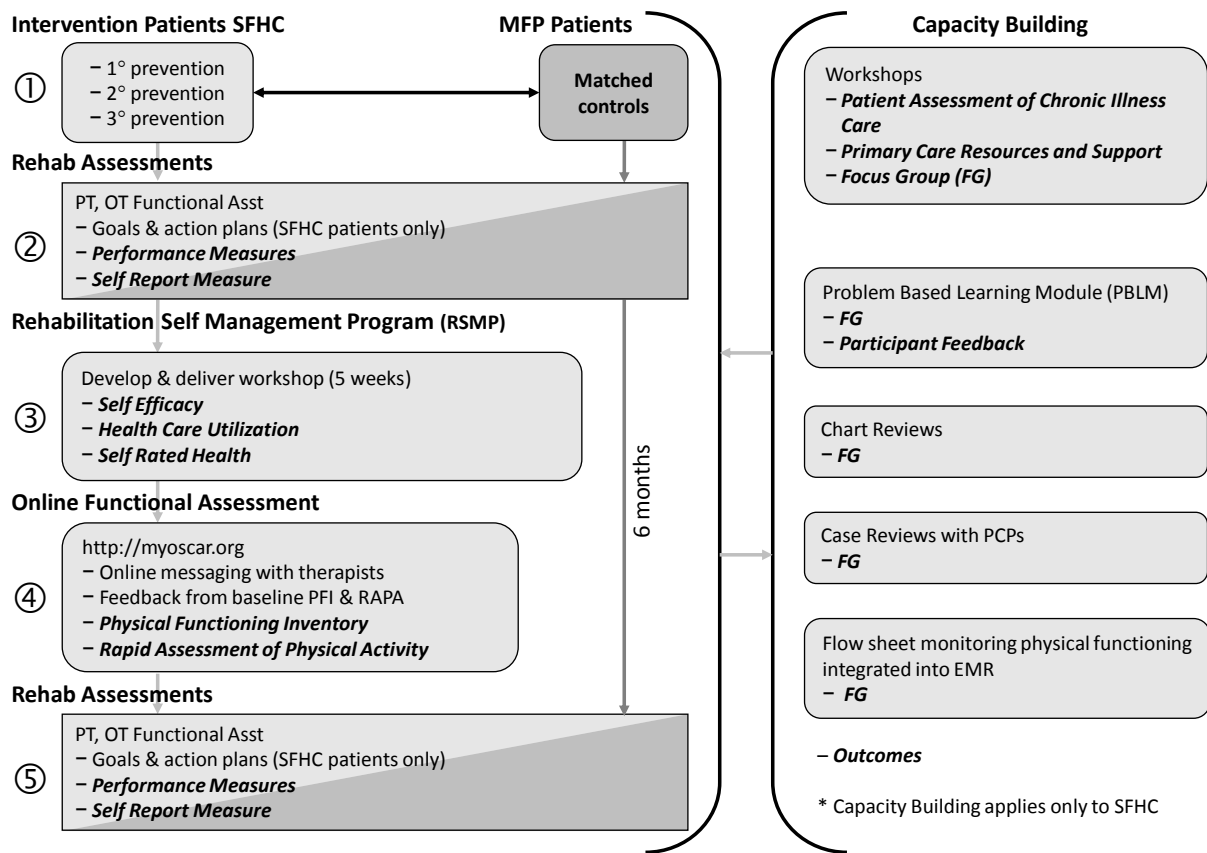

Supplement: MOESM1 [file 9435192]
